# Supplementary material for: Enhanced photoluminescence and phosphorescence properties of green phosphor Zn2GeO4:Mn2+via composition modification with GeO2and MgF2
Source: Royal Society of Chemistry journal article supplement (doi:10.1039/c6dt01594h), 2016-01-01
Supplement: c6dt01594h1.pdf [file c6dt01594h1.pdf]

## Electronic Supplementary Information

### Enhanced photoluminescence and phosphorescence properties of green phosphor $\text{Zn}_2\text{GeO}_4:\text{Mn}^{2+}$ via composition modification with $\text{GeO}_2$ and $\text{MgF}_2$

Yuexiao Pan, Li Li, Jing Lu, Ran Pang, Li Wang, Shaoming Huang

**Table S1** The  $\text{Mn}^{2+}$  doped green phosphor samples prepared from ZnO,  $\text{GeO}_2$ , and  $\text{MgF}_2$  with different molecule ratios sintered at 1100 °C for 5 h in air. (Note:  $\text{MnCO}_3$  was used for source of  $\text{Mn}^{2+}$  doping with concentration of 1 mol% of  $\text{Zn}^{2+}$  for all the samples).

| Sample names                                 | Molecule ratios |                |                |
|----------------------------------------------|-----------------|----------------|----------------|
|                                              | ZnO             | $\text{GeO}_2$ | $\text{MgF}_2$ |
| ZGOM                                         | 200             | 100            | 0              |
| ZGOM-0.5 $\text{GeO}_2$                      | 200             | 150            | 0              |
| ZGOM-1.0 $\text{GeO}_2$                      | 200             | 200            | 0              |
| ZGOM-1.25 $\text{GeO}_2$                     | 200             | 225            | 0              |
| ZGOM-1.5 $\text{GeO}_2$                      | 200             | 250            | 0              |
| ZGOM-2.0 $\text{GeO}_2$                      | 200             | 300            | 0              |
| ZGOM-1.0 $\text{GeO}_2$ -0.05 $\text{MgF}_2$ | 200             | 200            | 5              |
| ZGOM-1.0 $\text{GeO}_2$ -0.1 $\text{MgF}_2$  | 200             | 200            | 10             |
| ZGOM-1.0 $\text{GeO}_2$ -0.2 $\text{MgF}_2$  | 200             | 200            | 20             |
| ZGOM-1.0 $\text{GeO}_2$ -0.3 $\text{MgF}_2$  | 200             | 200            | 30             |
| ZGOM-1.0 $\text{GeO}_2$ -0.4 $\text{MgF}_2$  | 200             | 200            | 40             |

**Table S2** The Parameters for Crystallography and Refinement Crystallographic data.

|                                  | Crystallographic data                                | Atomic coordinates                   |
|----------------------------------|------------------------------------------------------|--------------------------------------|
| GeO <sub>2</sub>                 | R-Bragg 4.387                                        | Site x y z                           |
|                                  | Space group P31-21                                   | Ge1 0.44414(90) 0.00000 0.33333      |
|                                  | Wt% - Rietveld<br>34.55%                             | O1 0.3786(27) 0.3019(19) 0.2207(32)  |
|                                  | Lattice parameters<br>a 4.99749 (Å)<br>c 5.65048 (Å) |                                      |
| Zn <sub>2</sub> GeO <sub>4</sub> | R-Bragg 5.127                                        | Site x y z                           |
|                                  | Spacegroup R-3                                       | Ge1 0.2158(14) 0.1927(15) 0.2486(32) |
|                                  | Wt% - Rietveld 65.45%                                | Zn1 0.2173(15) 0.1925(16) 0.5805(30) |
|                                  | Lattice parameters                                   | Zn2 0.2137(17) 0.1901(16) 0.9183(26) |
|                                  | a 14.23500 (Å)                                       | O1 0.1871(40) 0.1103(54) 0.0850(82)  |
|                                  | c 9.52446 (Å)                                        | O2 0.1963(50) 0.1143(55) 0.4119(85)  |
|                                  |                                                      | O3 0.2300(21) 0.1212(35) 0.7579(76)  |
|                                  |                                                      | O4 0.3263(49) 0.3259(57) 0.2775(23)  |
|                                  |                                                      |                                      |

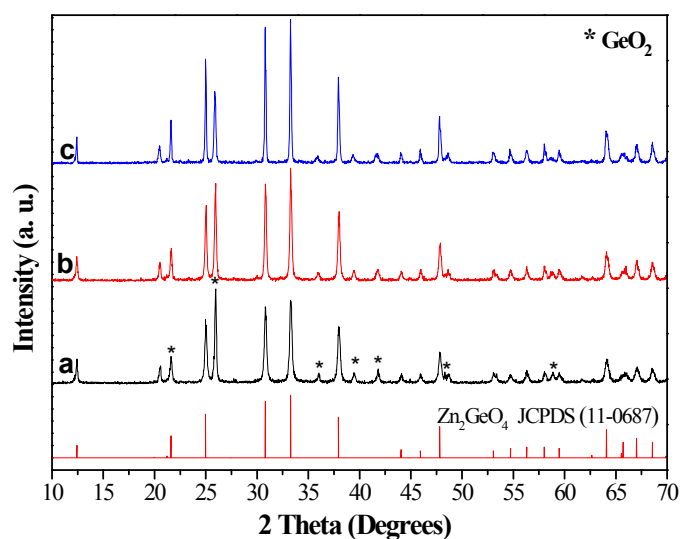

**Figure S1** XRD patterns of Mn<sup>2+</sup> doped samples prepared from starting materials ZnO, GeO<sub>2</sub> and MnCO<sub>3</sub> with molecule ratio of 99 ZnO:100 GeO<sub>2</sub>: 1 MnCO<sub>3</sub> sintered

at (a) 700, (b) 900, and (c) 1100 °C for 5 h in air.

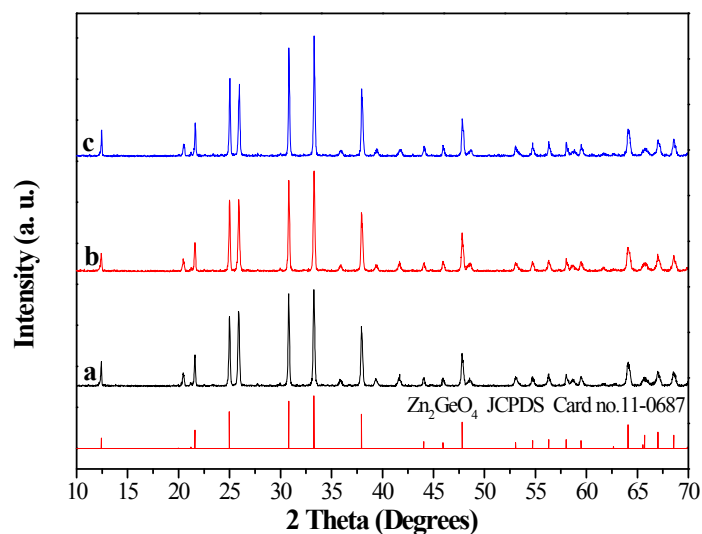

**Figure S2** XRD patterns of Mn<sup>2+</sup> doped samples prepared from ZnO and GeO<sub>2</sub> with molecule ratios of (a) 100 ZnO:100 GeO<sub>2</sub>, (b) 110 ZnO:100 GeO<sub>2</sub> and (c) 120 ZnO:100 GeO<sub>2</sub> sintered at 1100 °C for 5 h in air.

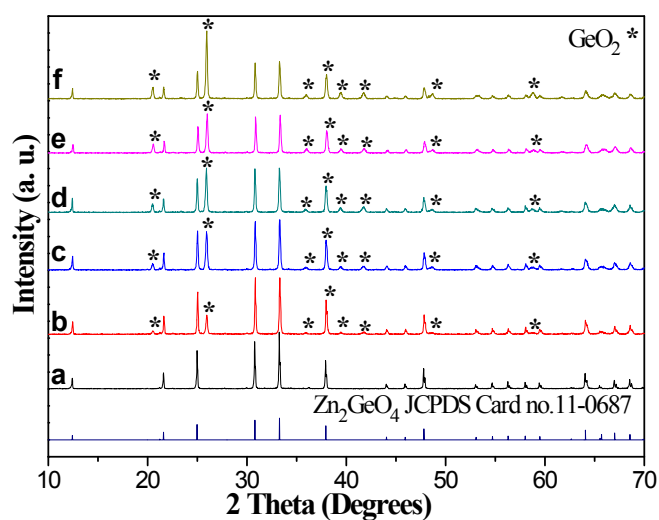

**Figure S3** XRD patterns of Mn<sup>2+</sup> doped phosphor samples: (a) ZGOM, (b) ZGOM-0.5GeO<sub>2</sub>, (c) ZGOM-1.0GeO<sub>2</sub>, (d) ZGOM-1.25GeO<sub>2</sub>, (e) ZGOM-1.5GeO<sub>2</sub>, and (f) ZGOM-2.0GeO<sub>2</sub>.

ZGOM-2.0GeO<sub>2</sub>. (Note: “\*” denotes GeO<sub>2</sub> phase.)

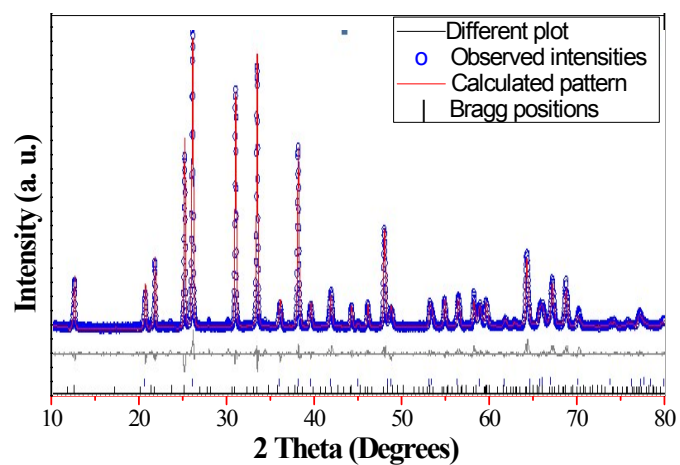

**Figure S4** Rietveld refinement XRD patterns of the Mn<sup>2+</sup> doped sample ZGOM-1.5GeO<sub>2</sub>.

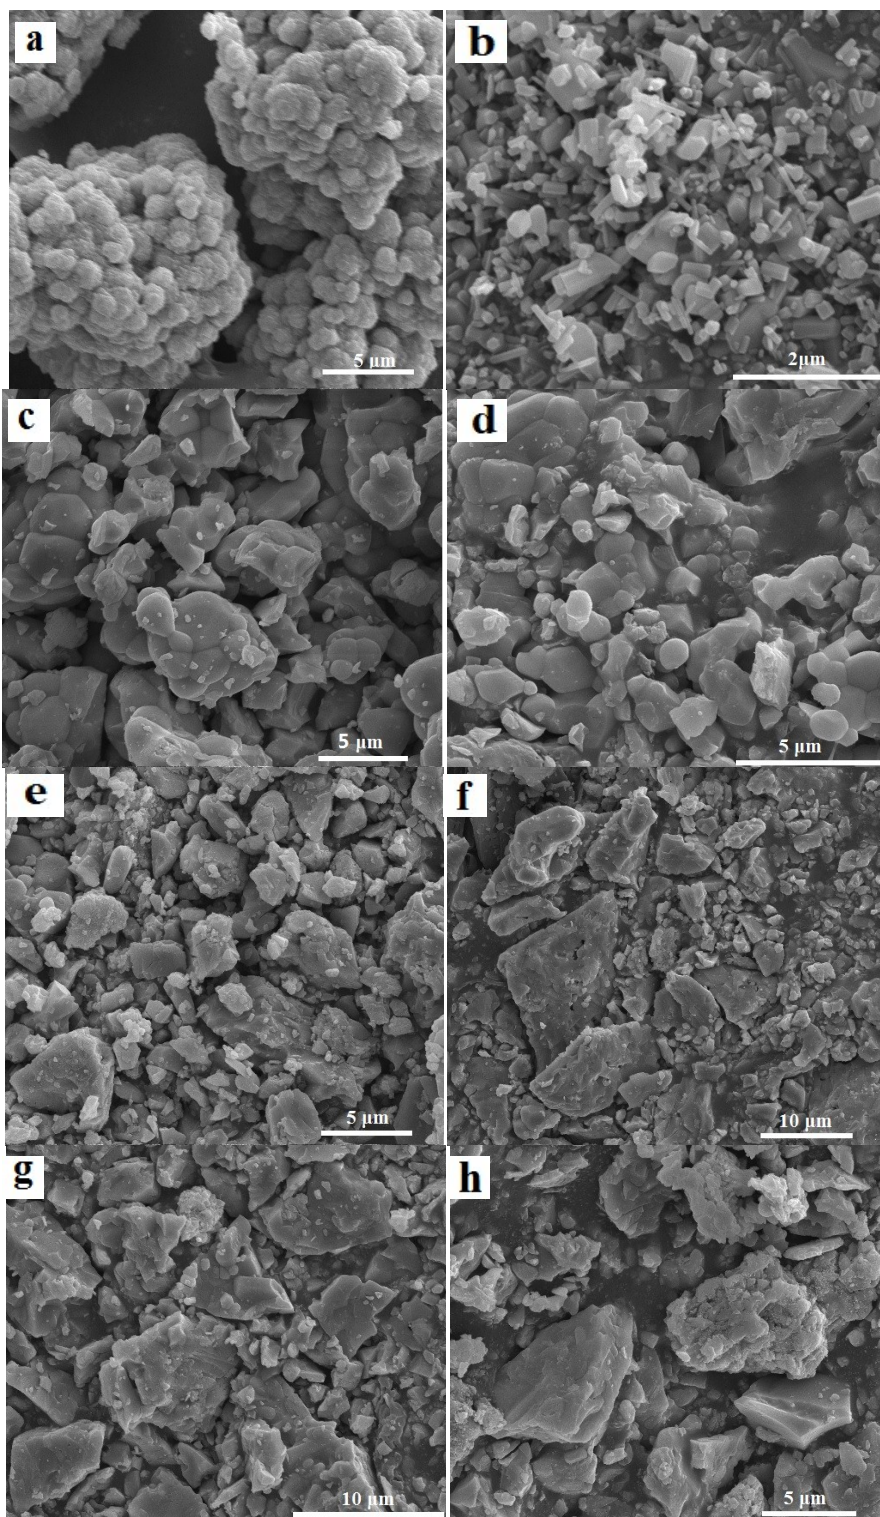

**Figure S5** SEM images of starting materials (a) GeO<sub>2</sub> and (b) ZnO used in synthesis, and as-prepared samples (c) ZGOM, (d) ZGOM- 0.5 GeO<sub>2</sub>, (e) ZGOM-1.0 GeO<sub>2</sub>, (f)

ZGOM-1.25 GeO<sub>2</sub>, (g) ZGOM-1.5 GeO<sub>2</sub>, and (h) ZGOM- 2.0 GeO<sub>2</sub>.

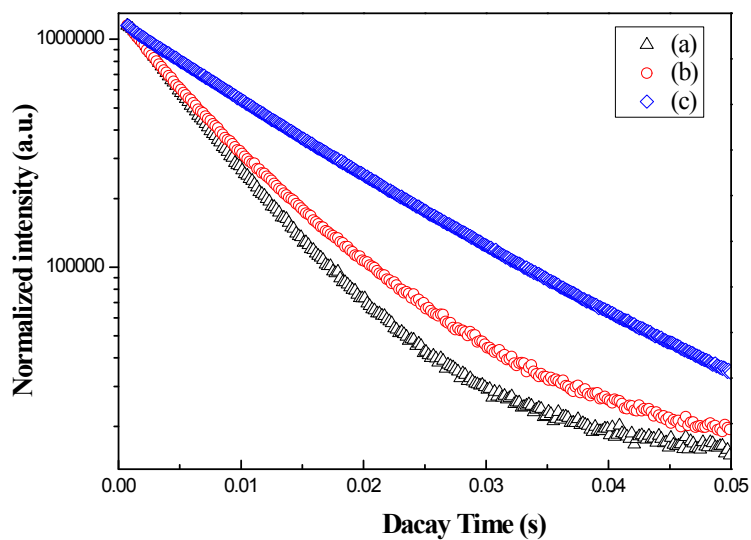

**Figure S6** Decay curves of emission at 532 nm of samples: (a) ZGOM, (b) ZGOM-1.0GeO<sub>2</sub>, (c) ZGOM-1.5GeO<sub>2</sub> excited at 350 nm measured at 77 K.

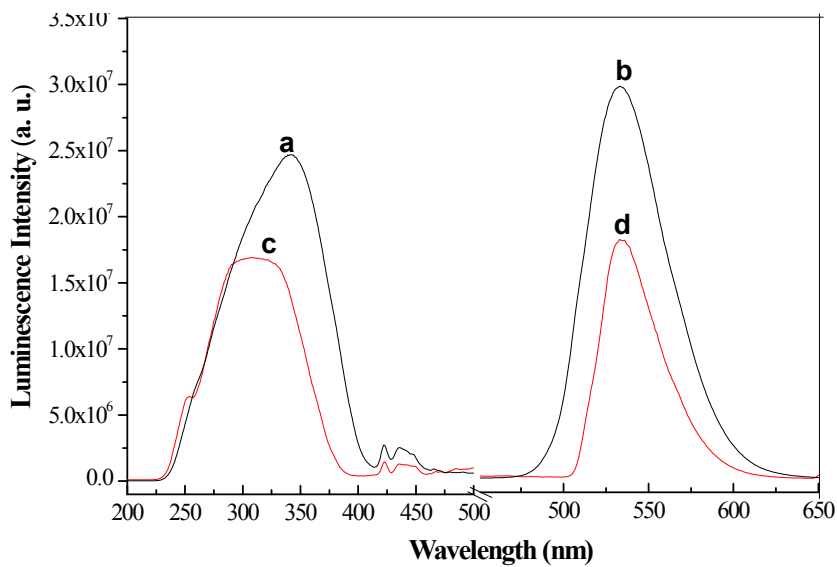

**Figure S7** Excitation ( $\lambda_{em} = 532$  nm) and emission ( $\lambda_{ex} = 336$  nm) spectra of Mn<sup>2+</sup> doped sample ZGOM-1.5GeO<sub>2</sub> measured (a, b) at 298 K and (c, d) 77 K.

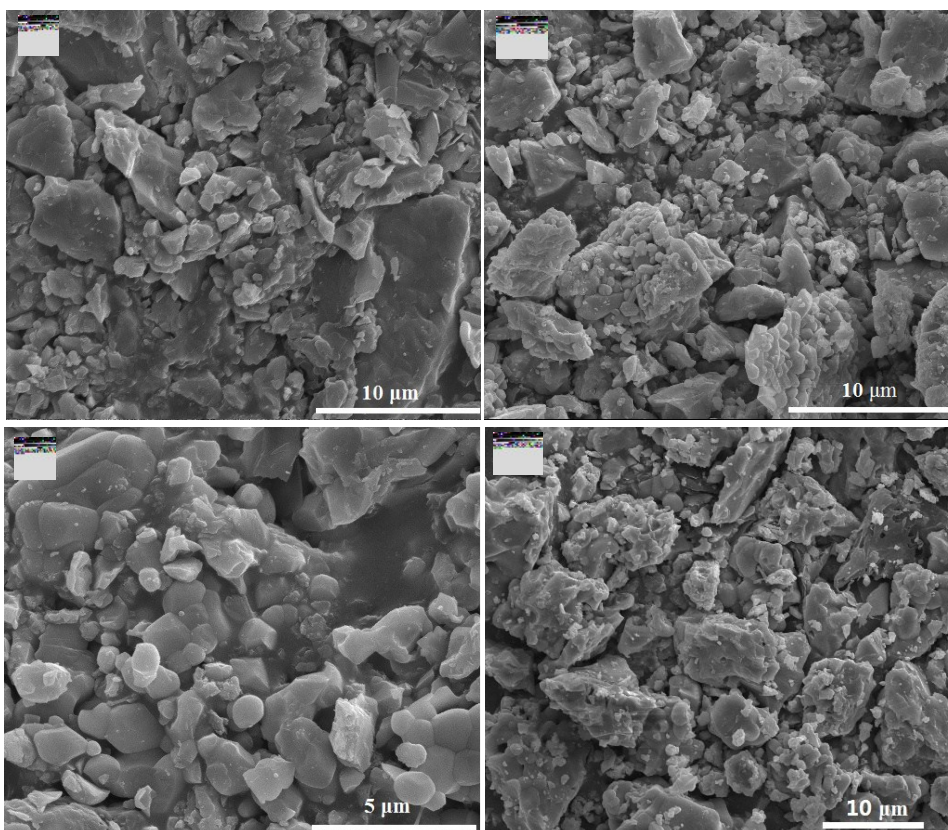

**Figure S8** SEM images of as-prepared samples (a) ZGOM-1.0GeO<sub>2</sub>-0.05MgF<sub>2</sub>, (b) ZGOM-1.0GeO<sub>2</sub>-1.0MgF<sub>2</sub>, (c) ZGOM-1.0GeO<sub>2</sub>-0.5MgF<sub>2</sub> and (d) ZGOM-1.0GeO<sub>2</sub>-0.8MgF<sub>2</sub>.

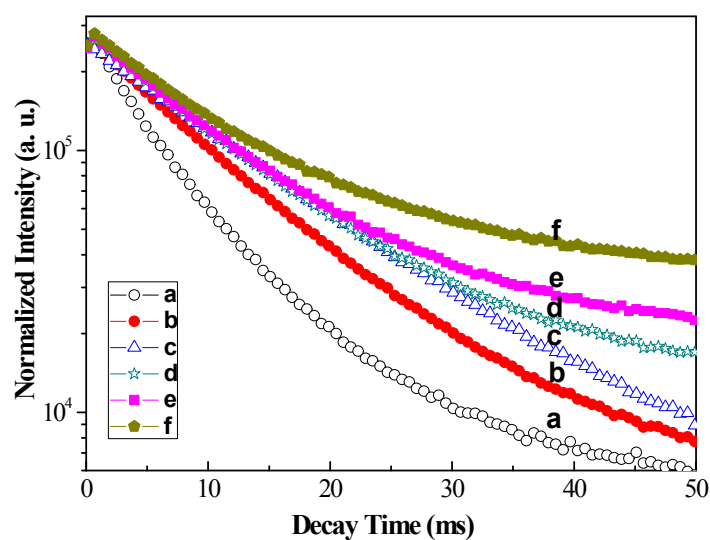

**Figure S9** Decay curves of emission at 532 nm (excited at 350 nm) from samples: (a) ZGOM-1.0GeO<sub>2</sub>, (b) ZGOM-1.0GeO<sub>2</sub>-0.05MgF<sub>2</sub>, (c) ZGOM-1.0GeO<sub>2</sub>-0.1MgF<sub>2</sub>, (d)

ZGOM-1.0GeO<sub>2</sub>-0.2MgF<sub>2</sub>, (e) ZGOM-1.0GeO<sub>2</sub>-0.3MgF<sub>2</sub>, and (f) ZGOM-1.0 GeO<sub>2</sub>-0.4 MgF<sub>2</sub>.

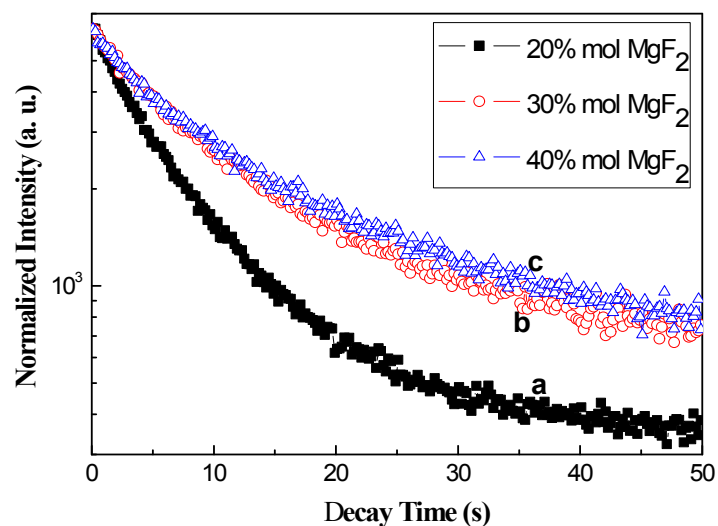

**Figure S10** Decay curves of emission at 666 nm (excited at 350 nm) from samples (a) ZGOM-1.0GeO<sub>2</sub>-0.2MgF<sub>2</sub>, (b) ZGOM-1.0GeO<sub>2</sub>-0.3MgF<sub>2</sub>, and (c) ZGOM-1.0 GeO<sub>2</sub>-0.4.

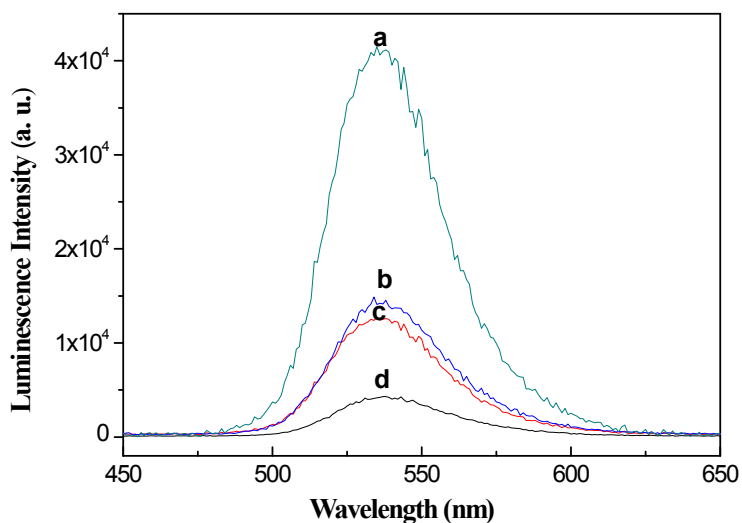

**Figure S11** Long lasting emission spectra of sample ZGOM-1.5GeO<sub>2</sub> after the excitation source is switched off at (a) 5 min, (b) 10 min, (c) 15 min, (d) 30 min.



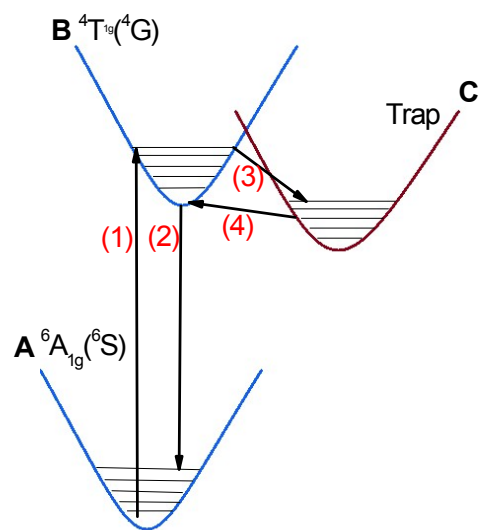

**Figure S12** Configurational coordinate diagram of persistent luminescence of Mn<sup>2+</sup> ions in Zn<sub>2</sub>GeO<sub>4</sub>.
